# Supplementary material
Source: HighWire-hosted journal article supplement (https://www.cmaj.ca/highwire/filestream/60024/field_highwire_adjunct_files/6/161379-res-6-at.pdf)
Supplement: 161379-res-6-at.pdf [file 161379-res-6-at.pdf]

## Appendix 6 (as supplied by the authors): Factors associated with HPV testing

| Patient characteristic               | Tested<br>n=1282 | Not tested<br>n=2361 | Unadjusted                    |         | Adjusted <sup>a</sup>         |         |
|--------------------------------------|------------------|----------------------|-------------------------------|---------|-------------------------------|---------|
|                                      |                  |                      | OR (95% CI)                   | p-value | OR (95% CI)                   | p-value |
| Age at diagnosis<br>Mean (SD)        | 59.8 (10.2)      | 60.7 (10.9)          | 0.91 (0.84-1.00) <sup>b</sup> | ***     | 1.00 (0.91-1.09) <sup>b</sup> |         |
| Sex                                  |                  |                      |                               |         |                               |         |
| Female                               | 20%              | 23%                  | reference                     | ***     | 1 reference                   | ***     |
| Male                                 | 80%              | 77%                  | 1.27 (1.03-1.57)              |         | 1.31 (1.04-1.64)              |         |
| Oropharyngeal subsite                |                  |                      |                               |         |                               |         |
| Tonsil                               | 55%              | 47%                  | reference                     | *       | reference                     | **      |
| Base-of-tongue                       | 36%              | 38%                  | 0.91 (0.75-1.10)              |         | 0.84 (0.69-1.02)              |         |
| Other                                | 9%               | 15%                  | 0.44 (0.33-0.58)              |         | 0.57 (0.42-0.76)              |         |
| Smoking status                       |                  |                      |                               |         |                               |         |
| Current                              | 37%              | 45%                  | reference                     | *       | reference                     | ***     |
| Former                               | 38%              | 36%                  | 1.44 (1.18-1.75)              |         | 1.28 (1.02-1.61)              |         |
| Never                                | 26%              | 19%                  | 2.14 (1.69-2.71)              |         | 1.53 (1.13-2.09)              |         |
| Pack-years <sup>c</sup><br>Mean (SD) | 33.5 (23.9)      | 37.7 (24.8)          | 0.93 (0.90-0.96)              | *       | 0.98 (0.94-1.02)              |         |
| Alcohol consumption                  |                  |                      |                               |         |                               |         |
| Moderate/heavy                       | 36%              | 40%                  | reference                     | **      | reference                     |         |
| None/light                           | 64%              | 60%                  | 1.41 (1.18-1.69)              |         | 1.08 (0.88-1.33)              |         |
| Tumor (T) stage                      |                  |                      |                               |         |                               |         |
| 1                                    | 19%              | 22%                  | reference                     |         | reference                     |         |
| 2                                    | 34%              | 36%                  | 0.96 (0.75-1.22)              |         | 0.98 (0.76-1.27)              |         |
| 3                                    | 24%              | 23%                  | 0.78 (0.60-1.02)              |         | 0.80 (0.61-1.06)              |         |
| 4                                    | 23%              | 19%                  | 0.89 (0.68-1.16)              |         | 1.02 (0.76-1.35)              |         |
| Nodal (N) stage                      |                  |                      |                               |         |                               |         |
| 0                                    | 15%              | 22%                  | reference                     | *       | reference                     | ***     |
| 1                                    | 11%              | 14%                  | 1.30 (0.94-1.79)              |         | 1.21 (0.86-1.69)              |         |
| 2                                    | 67%              | 56%                  | 1.77 (1.40-2.25)              |         | 1.50 (1.16-1.94)              |         |
| 3                                    | 7%               | 8%                   | 1.28 (0.87-1.88)              |         | 1.08 (0.72-1.61)              |         |

<sup>a</sup>Multivariable logistic regression model comparing tested vs. not tested for p16. All variables in table were included as covariates in the models, stratified by province.

<sup>b</sup>per 10-year periods; <sup>c</sup>10-pack-year increase (among ever-smokers)

OR – odds ratio; CI – confidence interval

\* p<0.0001; \*\* p<0.001; \*\*\* p<0.05
